# Supplementary material for: A Sensitive Fluorescence Polarization Immunoassay for the Rapid Detection of Okadaic Acid in Environmental Waters
Source: MDPI journal article supplement (doi:10.3390/bios13040477), 2023-04-16
Supplement: s1 [file s1]

Supplementary Material

# A Sensitive Fluorescence Polarization Immunoassay for the Rapid Detection of Okadaic Acid in Environmental Waters

Olga D. Hendrickson <sup>1</sup>, Liliya I. Mukhametova <sup>2</sup>, Elena A. Zvereva <sup>1</sup>, Anatoly V. Zherdev <sup>1</sup>, and Sergei A. Eremin <sup>1,2,\*</sup>

<sup>1</sup> A. N. Bach Institute of Biochemistry, Research Center of Biotechnology, Russian Academy of Sciences, Leninsky Prospekt 33, 119071 Moscow, Russia; odhendrick@gmail.com (O.D.H.); zverevaea@yandex.ru (E.A.Z.); zherdev@inbi.ras.ru (A.V.Z.)

<sup>2</sup> Department of Chemical Enzymology, Faculty of Chemistry, M. V. Lomonosov Moscow State University, Leninskie Gory 1, 119991 Moscow, Russia; liliya106@mail.ru

\* Correspondence: saeremin@gmail.com; Tel.: +7-916-5127654

Mass spectra were obtained using a Q-Exactive tandem mass spectrometer coupled to an Ultimate 3000 high-performance liquid chromatograph; samples were ionized via electrospray in a HESI-II ionization source (Thermo Scientific, Waltham, MA USA). The mass spectrum of the first order, which was obtained in the mode of registration of positively charged ions, is presented below.

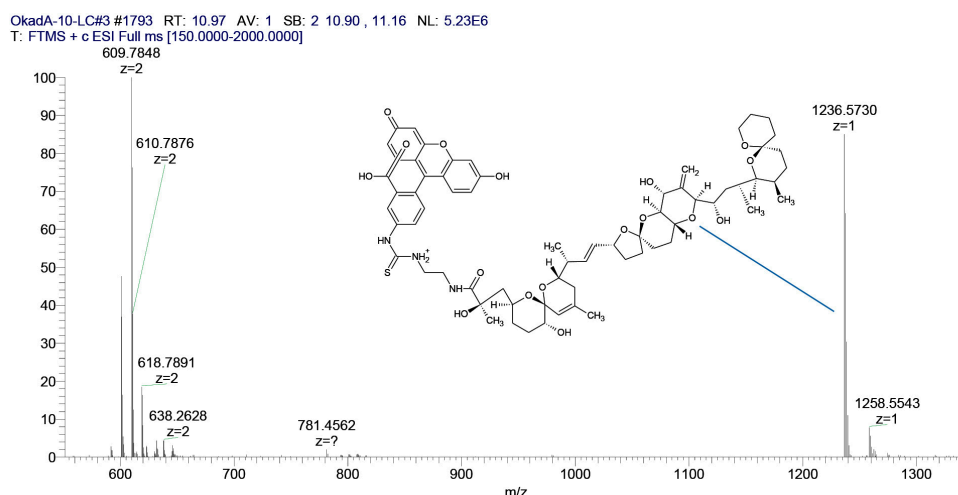

**Figure S1.** Mass spectra of OA-EDF tracer.
